# Supplementary material for: Recombinant domains III of Tick-Borne Encephalitis Virus envelope protein in combination with dextran and CpGs induce immune response and partial protectiveness against TBE virus infection in mice
Source: PubMed Central journal article supplement (PMC5054610; doi:10.1186/s12879-016-1884-5), 2016-10-07
Supplement: 12879_2016_1884_MOESM2_ESM.pdf [file 12879_2016_1884_MOESM2_ESM.pdf]

Supplemental Table 1. ELISA and Western blot (WB) analysis of recombinant proteins, immobilized on dextran, with sera of TBE patients or healthy donors.

| # sample <sup>a</sup> | TBEV subtype prevalent in the region | IgG titer ELISA  | DBD2-D3S        | DBD2-D3E | DBD2-D3F | DBD |
|-----------------------|--------------------------------------|------------------|-----------------|----------|----------|-----|
|                       |                                      |                  | ELISA/WB        | ELISA/WB | ELISA/WB | WB  |
| 96                    | Siberian                             | 1:2400           | +/ <sup>b</sup> | +/+      | +/+      | –   |
| M 151                 | European, Siberian                   | 1:200            | +/+             | +/+      | +/+      | –   |
| 375 (II)              | Siberian                             | 1:2800           | +/+             | +/+      | +/+      | –   |
| 402 (II)              | Siberian                             | n/d <sup>c</sup> | +/+             | -/+      | +/+      | –   |
| M 988                 | Siberian                             | <1:100           | -/+             | -/+      | -/+      | –   |
| M 2545                | Siberian                             | 1:400            | +/+             | +/+      | +/+      | –   |
| M 2546                | Siberian                             | 1:1400           | +/+             | +/+      | +/+      | –   |
| M 2548                | Siberian                             | <1:100           | +/+             | +/+      | +/+      | –   |
| M 2549                | Siberian                             | 1:1700           | +/+             | +/+      | +/+      | –   |
| M 2550                | Siberian                             | 1:300            | +/+             | +/+      | +/+      | –   |
| M 2551                | Far-Eastern                          | 1:1800           | +/+             | +/+      | +/+      | –   |
| <b><i>M 1311</i></b>  | Siberian                             | <1:100           | -/-             | -/-      | -/-      | –   |

<sup>a</sup> Serum of a healthy donor is shown in bold italic, all other sera samples are from patients with clinically proven TBE diagnosis.

<sup>b</sup> +/- presence of effect (antibodies in ELISA, or band in WB); -- absence of effect (antibodies in ELISA, or band in WB)

<sup>c</sup> n/d – not done

Supplemental Table 2. Clinical symptoms in mice, immunized by different schemes.

| Preparation        | N mice | Day 0<br>1 <sup>st</sup><br>dose | Preparation | Day 7<br>2 <sup>nd</sup><br>dose | Day 14<br>3 <sup>d</sup><br>dose | Day 21 <sup>b</sup><br>i/p<br>200<br>LD <sub>50</sub> | Day 42<br>N mice |         | Survived animals with clinical<br>symptoms <sup>c</sup> |              |
|--------------------|--------|----------------------------------|-------------|----------------------------------|----------------------------------|-------------------------------------------------------|------------------|---------|---------------------------------------------------------|--------------|
|                    |        |                                  |             |                                  |                                  |                                                       | Survived         | Healthy | mild (m=1)                                              | severe (m=2) |
| Standard scheme    |        |                                  |             |                                  |                                  |                                                       |                  |         |                                                         |              |
| 3DIII+AD           | 10     | + <sup>a</sup>                   | 3DIII+AD    | +                                | +                                | TBEV<br>Vas                                           | 5                | 0       | 1                                                       | 4            |
| Prime-boost scheme |        |                                  |             |                                  |                                  |                                                       |                  |         |                                                         |              |
| Tick-E-Vac         | 10     | +                                | 3DIII+AD    | +                                | +                                | TBEV<br>Vas                                           | 10               | 6       | 4                                                       | 0            |
| Reference scheme   |        |                                  |             |                                  |                                  |                                                       |                  |         |                                                         |              |
| Tick-E-Vac         | 9      | -                                | Tick-E-Vac  | +                                | +                                | TBEV<br>Vas                                           | 9                | 9       | 0                                                       | 0            |
| Control group      |        |                                  |             |                                  |                                  |                                                       |                  |         |                                                         |              |
| Saline             | 10     | +                                | Saline      | +                                | +                                | TBEV<br>Vas                                           | 0                | 0       | 0                                                       | 0            |

<sup>a</sup> + mice were vaccinated; - mice were not vaccinated

<sup>b</sup> - day of challenge

<sup>c</sup> m=1 if mice were untidy, clumsy, and lost weight over 1.5g for at least 3 days; m=2 if mice showed signs of intoxication, paresis and paralysis of limbs.
